# Supplementary material for: Unanticipated favoured adsorption affinity of Th(iv) ions towards bidentate carboxylate functionalized carbon nanotubes (CNT–COOH) over tridentate diglycolamic acid functionalized CNT: density functional theoretical investigation
Source: Royal Society of Chemistry journal article supplement (doi:10.1039/c5ra16651a), 2015-01-01
Supplement: c5ra16651a1.pdf [file c5ra16651a1.pdf]

Electronic Supplementary Information (ESI)

**Unanticipated favoured adsorption affinity of Th(IV) ions towards bidentate carboxylate functionalized carbon nanotubes (CNT-COOH) over tridentate diglycolamic acid functionalized CNT: Density functional theoretical investigation**

A.K. Singha Deb, Sk. M. Ali<sup>\*#</sup>, K.T. Shenoy

Chemical Engineering Division, Bhabha Atomic Research Centre, Mumbai, India -40085

<sup>#</sup> Homi Bhabha National Institute, Mumbai, India -40085

<sup>\*</sup>Corresponding author E-mail: [musharaf@barc.gov.in](mailto:musharaf@barc.gov.in)

**Table S1.** Calculated structural parameters (in Å) of Th<sup>4+</sup> ion with HCOOH, DGA and C<sub>60</sub>-COOH at BP/SVP level of theory.

| Species               | M-O distance (Å) |           |            |             |
|-----------------------|------------------|-----------|------------|-------------|
|                       | amide O          | carboxy O | ethereal O | alcoholic O |
| HCOOH                 |                  | 1.994     |            | 4.146       |
| DGA                   | 2.182            | 2.198     | 2.495      |             |
| C <sub>60</sub> -COOH |                  | 2.078     |            | 2.357       |

**Table S2.** Calculated various molecular descriptors (eV) at B3LYP/TZVP level of theory.

|                                                   | E <sub>HOMO</sub> | E <sub>LUMO</sub> | E <sub>LUMO</sub> -E <sub>HOMO</sub> | χ     | η     | ΔN(Th <sup>4+</sup> ) | ΔN(Th <sup>4+</sup> -(H <sub>2</sub> O) <sub>8</sub> ) |
|---------------------------------------------------|-------------------|-------------------|--------------------------------------|-------|-------|-----------------------|--------------------------------------------------------|
| Th <sup>4+</sup>                                  | -56.23            | -34.09            | 22.13                                | 45.16 | 11.06 |                       |                                                        |
| Th <sup>4+</sup> -(H <sub>2</sub> O) <sub>8</sub> | -25.46            | -17.58            | 7.87                                 | 21.52 | 3.93  |                       |                                                        |
| CNT-DGA                                           | -4.32             | -3.91             | 0.41                                 | 4.11  | 0.205 | 1.820                 | 2.101                                                  |
| CNT-COOH                                          | -4.24             | -3.83             | 0.40                                 | 4.03  | 0.200 | 1.824                 | 2.111                                                  |
| C <sub>60</sub> -COOH                             | -5.85             | -4.14             | 1.70                                 | 4.99  | 0.85  | 1.684                 | 1.725                                                  |

**Table S3.** Calculated values of interaction energies (kcal/mol) at B3LYP/TZVP level of theory.

| Various stoichiometric reaction                                                   | ΔE      |
|-----------------------------------------------------------------------------------|---------|
| CNT-DGA + Th <sup>4+</sup> = CNT-DGA-Th <sup>4+</sup>                             | -875.61 |
| CNT-COOH + Th <sup>4+</sup> = CNT-COOH-Th <sup>4+</sup>                           | -792.84 |
| C <sub>60</sub> -COOH + Th <sup>4+</sup> = C <sub>60</sub> -COOH-Th <sup>4+</sup> | -627.06 |
| HCOOH + Th <sup>4+</sup> = HCCOH-Th <sup>4+</sup>                                 | -292.65 |
| HDGA + Th <sup>4+</sup> = HDGA-Th <sup>4+</sup>                                   | -581.46 |

**Table S4.** Comparison of bond distances in Å from Th<sup>4+</sup> metal centre for complexes/system under consideration without nitrate at BP/SVP level of theory with and without dispersion-corrected DFT of Grimme's D3 scheme.

| Bond                                        | DFT-D                                  |              |          |         | Without DFT-D    |              |          |         |
|---------------------------------------------|----------------------------------------|--------------|----------|---------|------------------|--------------|----------|---------|
|                                             | System of Th <sup>4+</sup> bonded with |              |          |         |                  |              |          |         |
|                                             | CNT-Side Surface                       | CNT-Open End | CNT-COOH | CNT-DGA | CNT-Side Surface | CNT-Open End | CNT-COOH | CNT-DGA |
| Th-C* (CNT)                                 | 2.552                                  | -            | -        | -       | 2.542            | -            | -        | -       |
| Th-H(CNTedge)                               | -                                      | 4.013        | -        | -       | -                | 3.935        | -        | -       |
| Th-O <sup>#</sup> (COOH)                    | -                                      | -            | 2.265    | -       | -                | -            | 2.265    | -       |
| Th-O <sup>#</sup> <sub>carbonyl</sub> (DGA) | -                                      | -            | -        | 2.192   | -                | -            | -        | 2.205   |
| Th-O <sub>ether</sub> (DGA)                 | -                                      | -            | -        | 2.440   | -                | -            | -        | 2.480   |

\*M-C: distances between metal and nearest six carbon atoms of a hexagon the CNT; # Average of two similar Th-O distances.

**Table S5.** Comparison of electronic and thermodynamic energies (in kcal/mol) of Th<sup>4+</sup> ion with non-functionalized and functionalized CNT in absence of nitrate ion at two level of theory: (i)<sup>#</sup> Geometry optimization at BP with Grimme's D3 dispersion correction/SVP & single point energy at B3LYP/TZVP level and (ii)<sup>†</sup> Geometry optimization at BP with Grimme's D3 dispersion correction/SVP & single point energy at B3LYP with Grimme's D3 dispersion correction /TZVP level.

| Complexation reaction                                                                                                        | $\Delta E$ (i) <sup>#</sup> | $\Delta E$ (ii) <sup>†</sup> |
|------------------------------------------------------------------------------------------------------------------------------|-----------------------------|------------------------------|
| Th <sup>4+</sup> + CNT <sub>S</sub> = CNT <sub>S</sub> -Th <sup>4+</sup>                                                     | -760.61                     | -764.28                      |
| Th <sup>4+</sup> + CNT <sub>O</sub> = CNT <sub>O</sub> -Th <sup>4+</sup>                                                     | -754.62                     | -765.84                      |
| CNT-COOH + Th <sup>4+</sup> = CNT-COOH-Th <sup>4+</sup>                                                                      | -792.83                     | -793.96                      |
| CNT-DGA + Th <sup>4+</sup> = CNT-DGA-Th <sup>4+</sup>                                                                        | -891.37                     | -884.54                      |
| Th <sup>4+</sup> (H <sub>2</sub> O) <sub>8</sub> + CNT <sub>S</sub> = CNT <sub>S</sub> -Th <sup>4+</sup> + 8H <sub>2</sub> O | 22.98                       | 35.14                        |
| Th <sup>4+</sup> (H <sub>2</sub> O) <sub>8</sub> + CNT <sub>O</sub> = CNT <sub>O</sub> -Th <sup>4+</sup> + 8H <sub>2</sub> O | 28.97                       | 33.58                        |
| CNT-COOH + Th <sup>4+</sup> (H <sub>2</sub> O) <sub>8</sub> = CNT-COOH-Th <sup>4+</sup> + 8H <sub>2</sub> O                  | -9.23                       | 5.46                         |
| CNT-DGA + Th <sup>4+</sup> (H <sub>2</sub> O) <sub>8</sub> = CNT-DGA-Th <sup>4+</sup> + 8H <sub>2</sub> O                    | -107.77                     | -85.11                       |

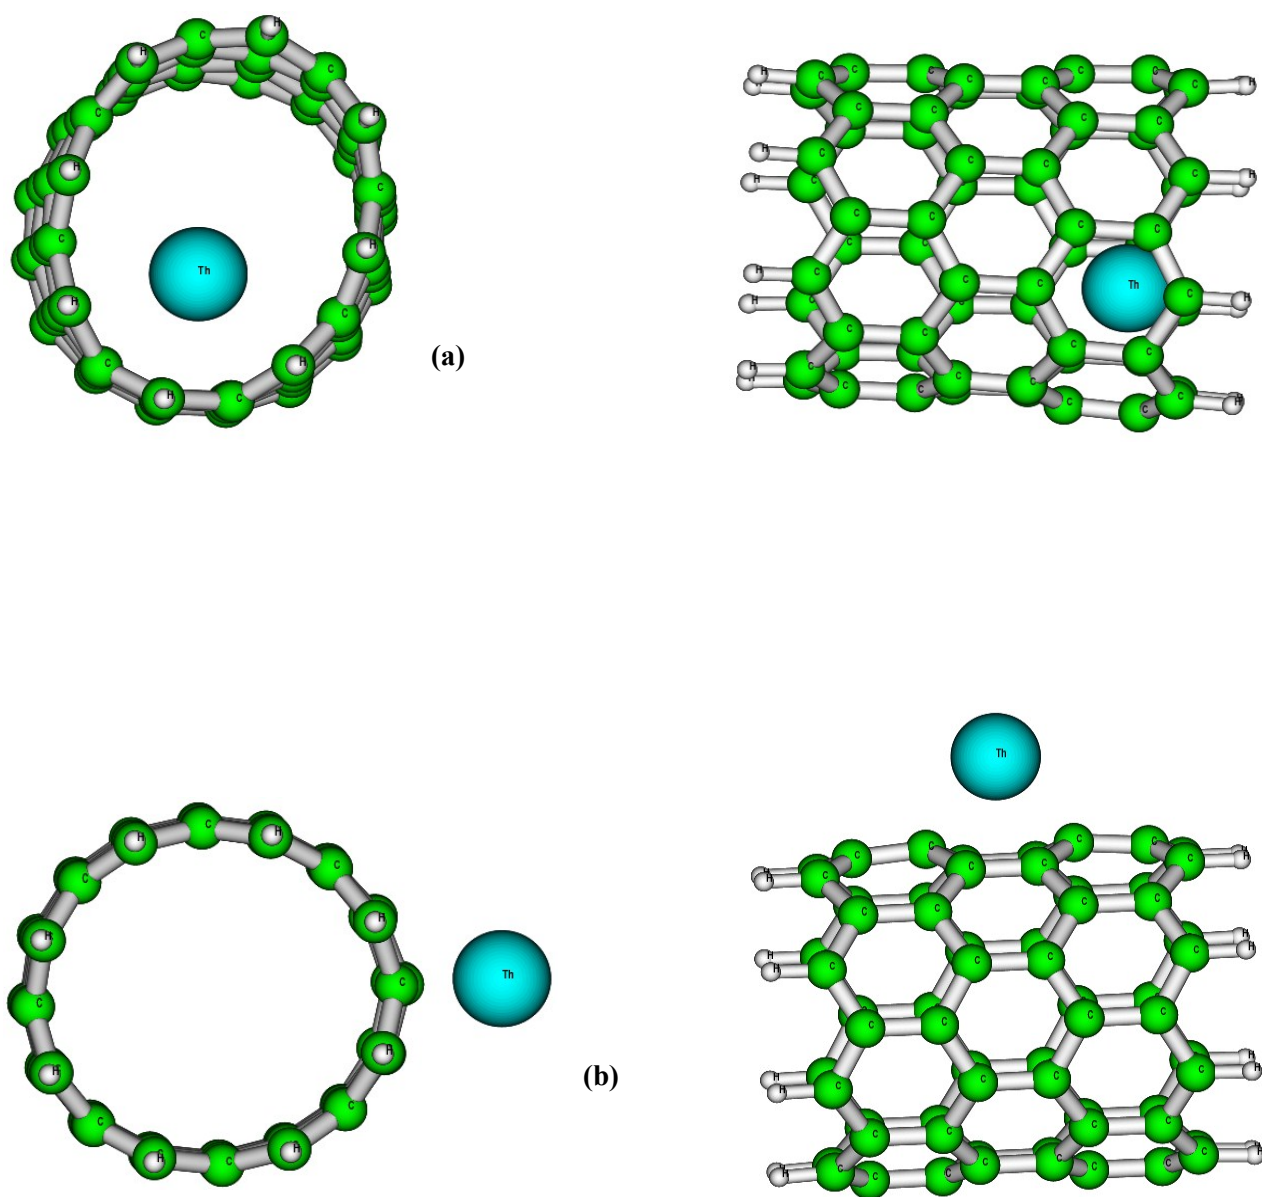

**Fig. S1.** Optimized structures of complexes of Th<sup>4+</sup> ion with non-functionalized/pristine CNT: (a) Interaction from sidewall of CNT (CNT<sub>s</sub>) and (b) from open edges of CNT (CNT<sub>e</sub>) at BP/SVP level of theory.

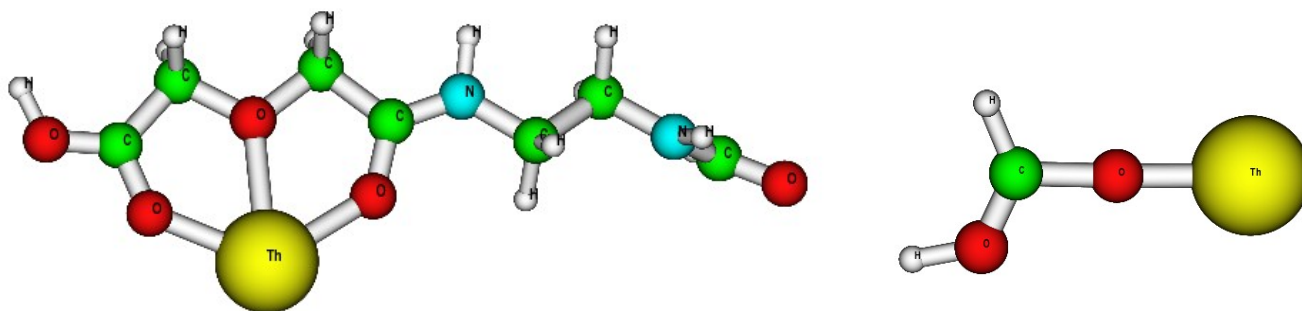

**Fig. S2.** Optimized structures of  $\text{Th}^{4+}$  complexes with DGA and COOH unit (connected to CNT in CNT-DGA and CNT-COOH, respectively) at BP/SVP level of theory.

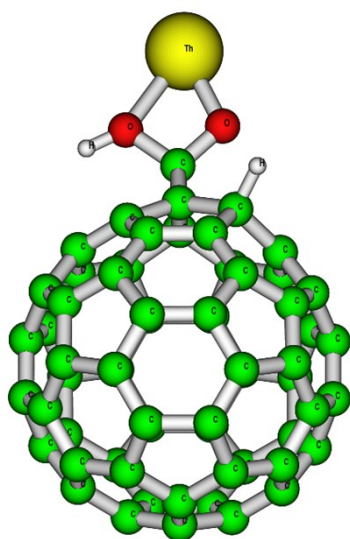

**Fig. S3.** Optimized structure of  $\text{Th}^{4+}$  complexes with  $\text{C}_{60}$ -COOH at BP/SVP level of theory.

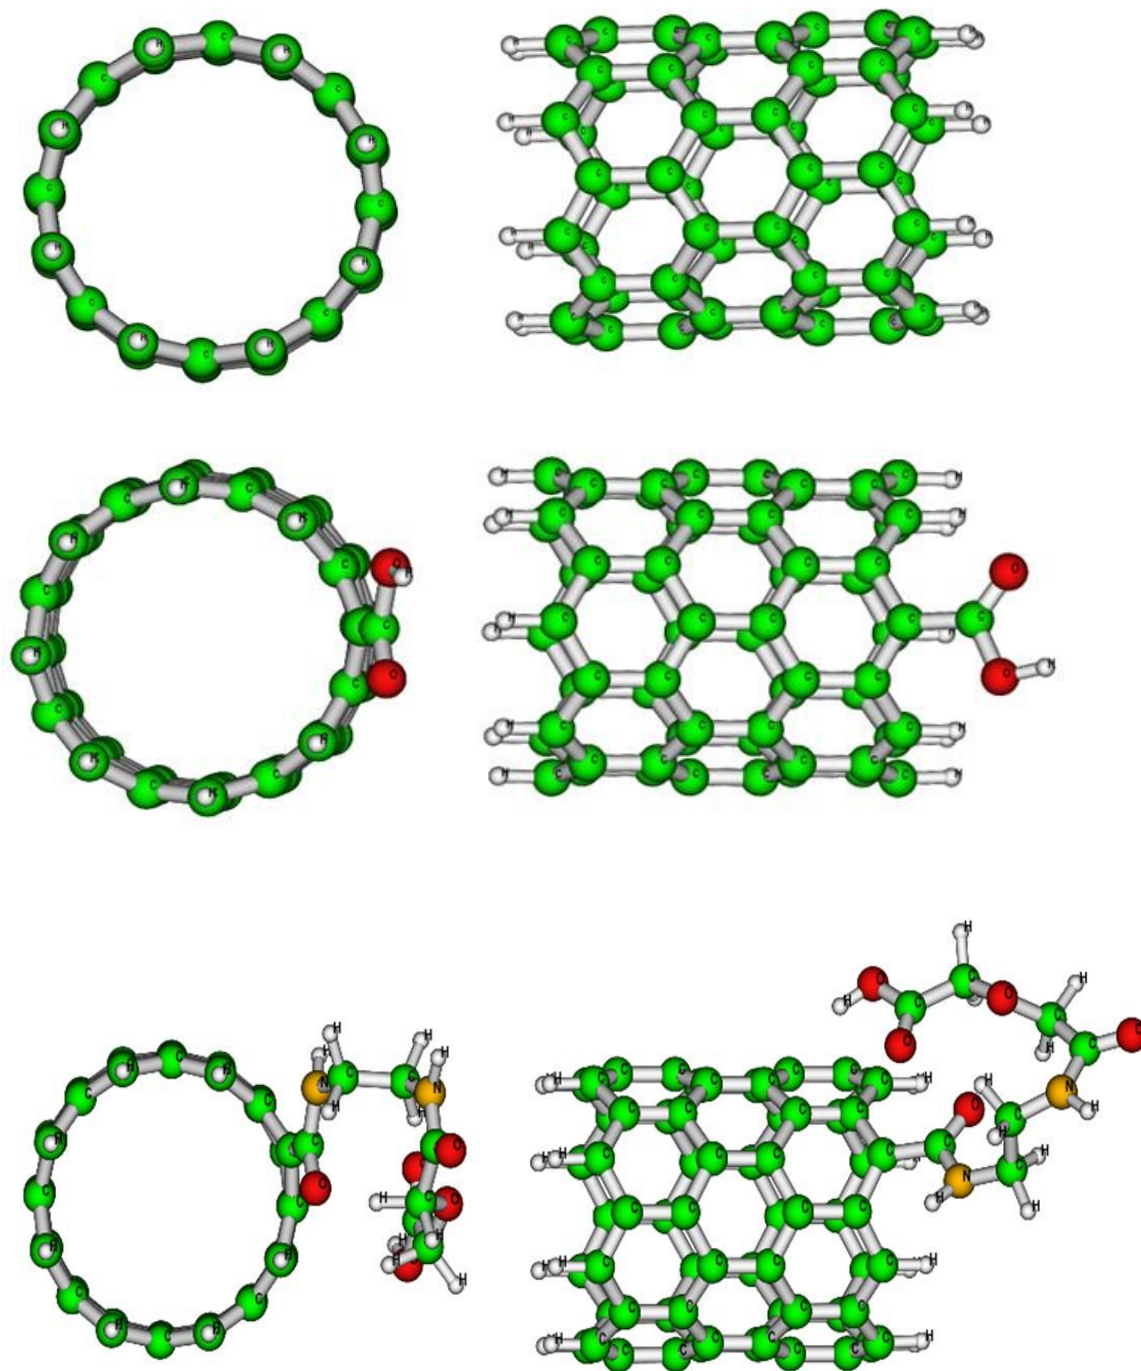

**Fig. S4.** Optimized geometries of pristine and COOH and DGE functionalized CNT at BP/SVP level of theory with dispersion-corrected DFT of Grimme's D3 scheme.

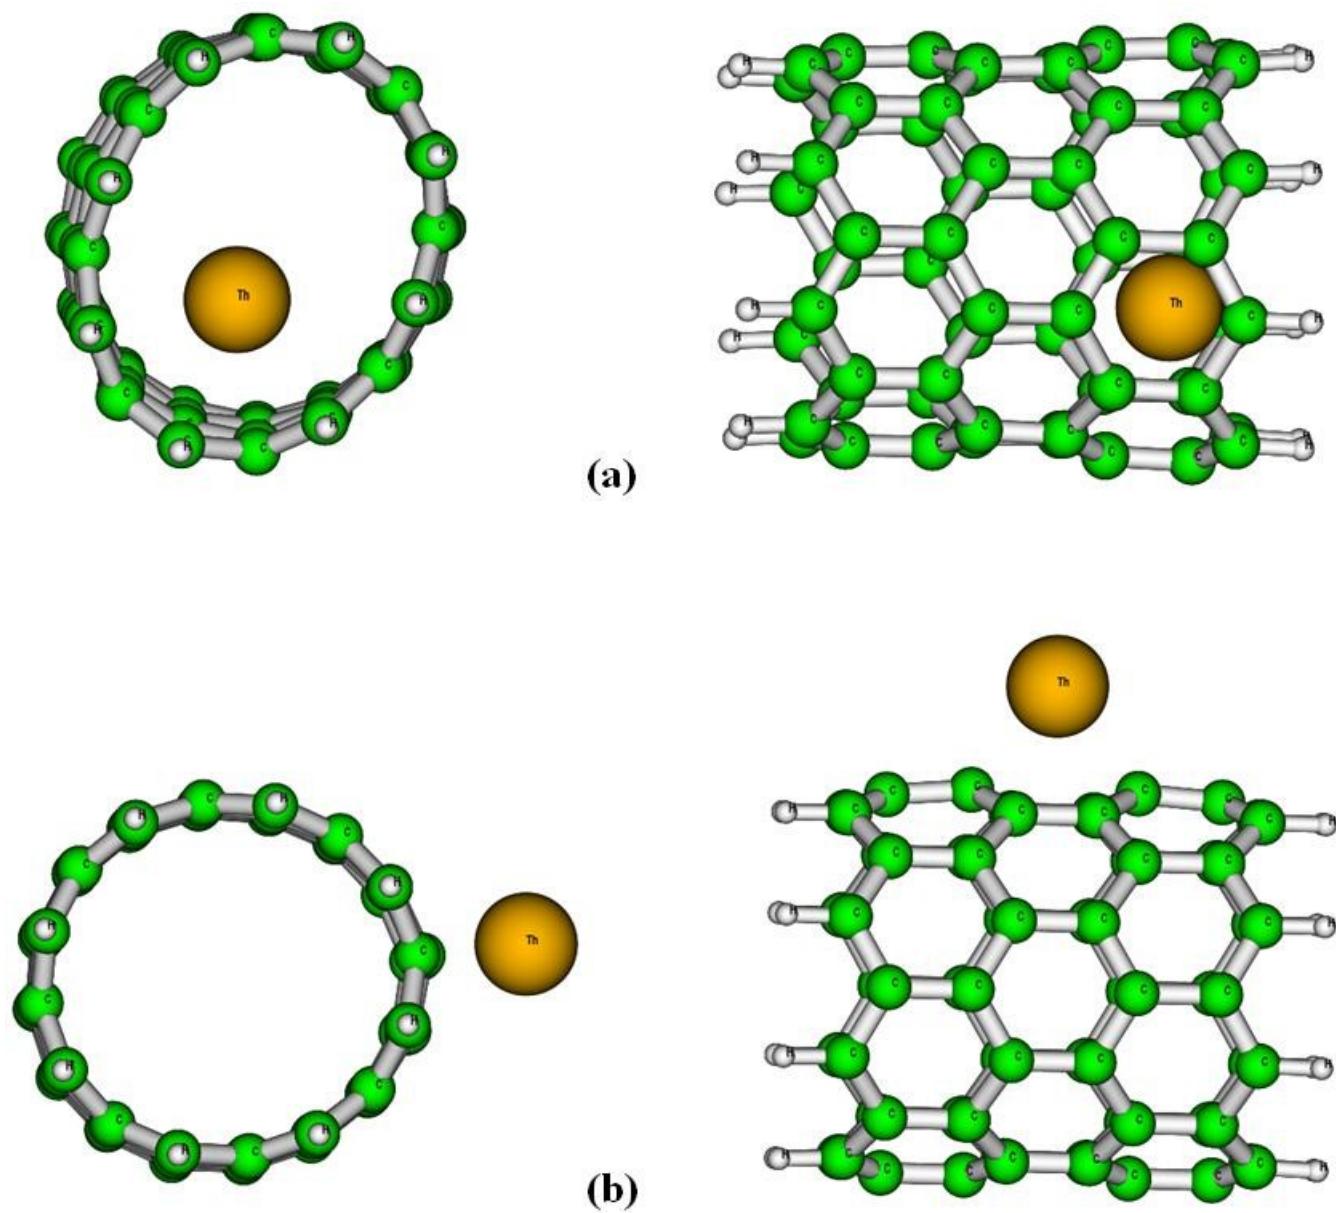

**Fig. S5.** Optimized structures of complexes of  $\text{Th}^{4+}$  ion with non-functionalized/pristine CNT at BP/SVP level of theory with dispersion-corrected DFT of Grimme's D3 scheme: (a) Interaction from sidewall of CNT ( $\text{CNT}_s$ ) and (b) from open edges of CNT ( $\text{CNT}_o$ ).



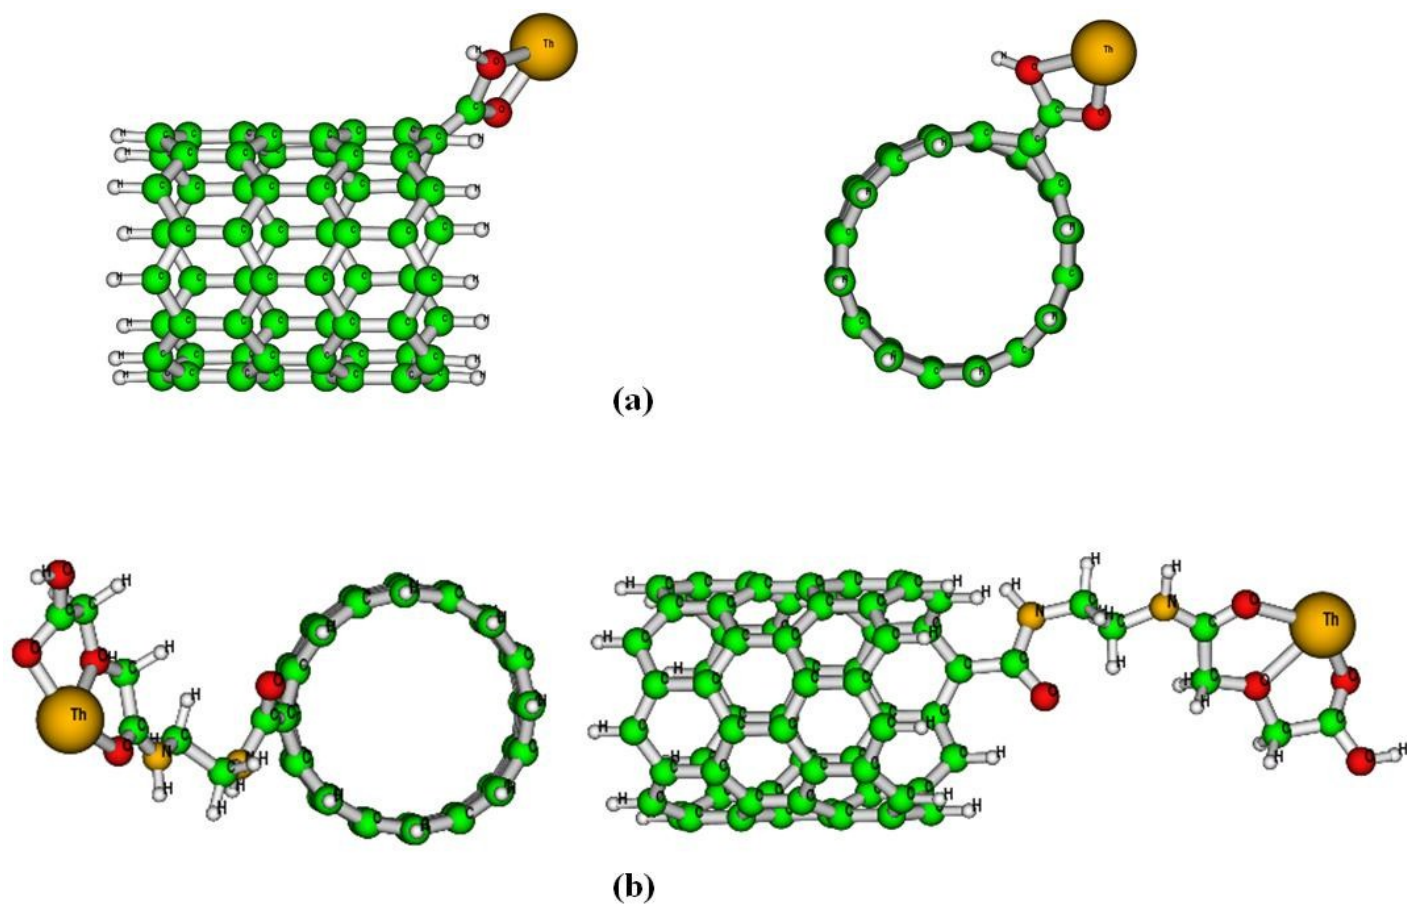

**Fig. S6.** Optimized structures of Th<sup>4+</sup> ion complex with (a) CNT-COOH, and (b) CNT-DGA, at BP/SVP level of theory with dispersion-corrected DFT of Grimme's D3 scheme.

### AIMD simulation of $\text{Th}^{4+}$ -water system

AIMD simulation was carried out using Perdew-Wang 91 (PW91) density functional with projector augmented wave method as implemented in VASP simulation package<sup>S1</sup>. The MD simulation box consists of one  $\text{Th}^{4+}$  ion and 64 water molecules in a cubic simulation cell of dimension  $12.50\text{\AA} \times 12.50\text{\AA} \times 12.50\text{\AA}$  with standard periodic boundary condition resulting into water density of  $1\text{g/cc}$ . The cutoff value of  $984.83\text{ eV}$  was used for kinetic energy. The final temperature was kept at  $440\text{K}$  to maintain the system at liquid state. Nose-Hoover thermostat was employed in the NVT ensemble with time step of  $1\text{ fs}$  for total simulation run of  $30\text{ ps}$ . The trajectories of last  $10\text{ps}$  were used to calculate the radial distribution function of  $\text{Th}^{4+}$  ion water system and then first solvation shell coordination number. The first sphere coordination number calculated from the integrated RDF was found to be  $8.00$ .

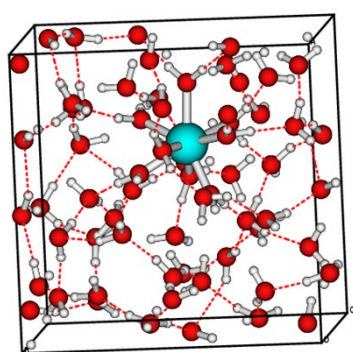

(a)

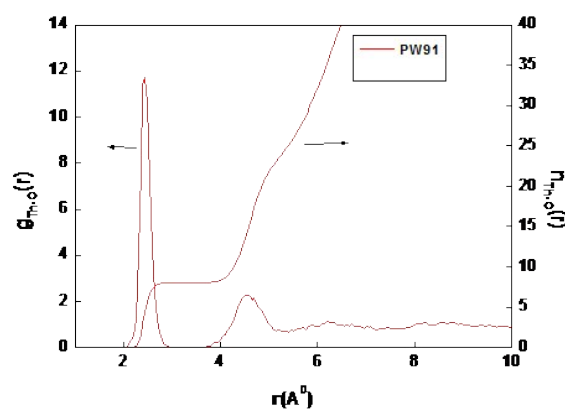

(b)

**Fig. S7.** (a) AIMD snap shot of  $\text{Th}^{4+}$ -( $\text{H}_2\text{O}$ )<sub>64</sub> system and (b) radial distribution function of Th-O ( $g_{\text{Th-O}}(r)$ ) using PW91.

### Reference

S1. G. Kresse and J. Hafner, Phys. Rev. B, 1993, 48, 13115–13118.
